# Supplementary material
Source: PubMed Central journal article supplement (PMC3204908)
Supplement: supp_blood-2011-04-350066_Document1.pdf [file supp_blood-2011-04-350066_Document1.pdf]

**Table S1**

Effect of *NUP98-HOXA10hd* on individual HSC clones of CD45<sup>mid</sup>lin<sup>-</sup>Rho<sup>-</sup>SP phenotype. BA; before analysis, NA; not available.

| <i>NUP98-HOXA10hd</i> -transduced clones | Total nucleated cells | Fraction transplanted / each mouse (M)          | (+) recipients / total # of M transplanted | LD reached (yes/no) | Estimated (min.) HSC expansion → # of HSCs generated <i>in vitro</i> | Range defined by ± 1 S.E. |
|------------------------------------------|-----------------------|-------------------------------------------------|--------------------------------------------|---------------------|----------------------------------------------------------------------|---------------------------|
| #1                                       | 1060000               | 1/5th/1M - 1/50th/2M - 1/500th/2M               | 1/1 - 2/2 - 2/2                            | no                  | >351.072                                                             | 132.712 ± 928.772         |
| #2                                       | 220000                | 1/5th/1M - 1/50th/2M - 1/500th/2M               | 1/1 - 2/2 - 2/2                            | no                  | >351.098                                                             | 132.726 ± 928.818         |
| #3                                       | 60000                 | 1/5th/1M - 1/50th/2M - 1/500th/2M               | 1/1 - 2/2 - 2/2                            | no                  | >351.096                                                             | 132.72 ± 928.818          |
| #4                                       | 40000                 | 1/5th/1M - 1/50th/2M - 1/500th/2M               | 0/1 - 0/2 - 0/2                            | no                  | not detected                                                         | NA                        |
| #5                                       | 40000                 | 1/5th/1M - 1/50th/2M - 1/500th/1M               | 1/1 - 2/2 - 1/1                            | no                  | >152.224                                                             | 60.804 ± 381.104          |
| #6                                       | 380000                | 1/5th/1M - 1/50th/2M - 1/500th/2M               | 1/1 - 2/2 - died BA                        | no                  | >34.884                                                              | 12.92 ± 94.354            |
| #7                                       | 580000                | 1/5th/1M - 1/50th/2M - 1/500th/2M               | 1/1 - 2/2 - 2/2                            | no                  | >351.074                                                             | 132.704 ± 928.812         |
| #8                                       | 100000                | 1/5th/1M - 1/50th/2M - 1/500th/2M               | 1/1 - 2/2 - 2/2                            | no                  | >351.1                                                               | 132.72 ± 928.82           |
| #9                                       | 2380000               | 1/5th/1M - 1/50th/2M - 1/500th/2M - 1/1000th/2M | 1/1 - 2/2 - 2/2 - 2/2                      | no                  | >1098.608                                                            | 577.15 ± 2091.068         |
| #10                                      | 50000                 | 1/5th/1M - 1/50th/2M - 1/500th/2M               | 1/1 - 2/2 - 2/2                            | no                  | >351.1                                                               | 132.715 ± 928.82          |
| #11                                      | 20000                 | 1/5th/1M - 1/50th/2M - 1/500th/2M - 1/1000th/1M | 1/1 - 2/2 - 2/2 - 1/1                      | no                  | >804.72                                                              | 383.392 ± 1689.062        |
| #12                                      | 750000                | 1/50th/1M - 1/500th/2M                          | 1/1 - 2/2                                  | no                  | >348.9                                                               | 129 ± 943.65              |
| #13                                      | 1100000               | 1/50th/1M - 1/500th/2M                          | 1/1 - 2/2                                  | no                  | >348.92                                                              | 129.03 ± 943.58           |
| #14                                      | 2200000               | 1/50th/1M - 1/500th/2M                          | 1/1 - 2/2                                  | no                  | >348.92                                                              | 128.92 ± 943.58           |
| #15                                      | 100000                | 1/50th/1M - 1/500th/2M                          | 1/1 - 2/2                                  | no                  | >348.92                                                              | 129.02 ± 943.63           |
| #16                                      | 1500000               | 1/100th/2M - 1/1000th/3M                        | 2/2 - 3/3                                  | no                  | >1098.9                                                              | 523.05 ± 2308.5           |
| #17                                      | 1600000               | 1/100th/2M - 1/1000th/3M                        | 2/2 - 3/3                                  | no                  | >1098.88                                                             | 523.04 ± 2308.48          |
| #18                                      | 1600000               | 1/100th/2M - 1/1000th/3M                        | 2/2 - 3/3                                  | no                  | >1098.88                                                             | 523.04 ± 2308.48          |
| #19                                      | 2900000               | 1/50th/1M - 1/500th/2M - 1/2000th/3M            | 1/1 - 2/2 - 3/3                            | no                  | >2309.56                                                             | 1188.42 ± 4487.75         |
| #20                                      | 3900000               | 1/50th/1M - 1/500th/2M - 1/2000th/3M            | 1/1 - 2/2 - 3/3                            | no                  | >2309.58                                                             | 1188.33 ± 4487.73         |
| #21                                      | 2500000               | 1/50th/1M - 1/500th/2M - 1/2000th/3M            | 1/1 - 2/2 - 3/3                            | no                  | >2309.5                                                              | 1188.5 ± 4487.75          |
| #22                                      | 2000000               | 1/50th/1M - 1/500th/2M - 1/2000th/2M            | 1/1 - 2/2 - 1/2                            | yes                 | ~1718.8                                                              | 827.2 ± 3571.6            |
| #23                                      | 400000                | 1/100th/2M - 1/1000th/3M - 1/5000th/2M          | 0/2 - 0/3 - 0/2                            | no                  | not detected                                                         | NA                        |
| #24                                      | 650000                | 1/1000th/3M                                     | (3/3)                                      | no                  | >1098.63                                                             | 522.47 ± 2310.035         |
| #25                                      | 2100000               | 1/100th/2M - 1/1000th/3M - 1/5000th/2M          | 0/2 - 0/3 - 0/2                            | no                  | not detected                                                         | NA                        |
| #26                                      | 800000                | 1/100th/1M - 1/1000th/3M - 1/5000th/2M          | 1/1 - 3/3 - 0/2                            | yes                 | ~2140.08                                                             | 1139.52 ± 4019.04         |
| #27                                      | 500000                | 1/100th/1M - 1/1000th/3M - 1/5000th/1M          | 1/1 - 3/3 - 0/1                            | yes                 | ~2772.55                                                             | 1355.4 ± 5671.5           |
| #28                                      | 2500000               | 1/5000th/2M - 1/10000th/2M                      | 1/2 - 0/2                                  | yes                 | ~3465.75                                                             | 1249.5 ± 9612.5           |

**Table S2**

Average peripheral blood lineage contribution to donor-derived compartment of representative recipients shown in figure 1C (top panel). NA; not available.

| <i>NUP98-<br/>HOXA10hd-<br/>transduced<br/>clones</i> | % myeloid cells ±<br>SD<br>(% Ly6G/Mac1) | % B cells ± SD<br>(% B220) | % T cells ± SD<br>(% CD4/CD8) |
|-------------------------------------------------------|------------------------------------------|----------------------------|-------------------------------|
| #1                                                    | 15 ± 7                                   | 64 ± 22                    | 21 ± 15                       |
| #2                                                    | 8 ± 1                                    | 71 ± 4                     | 21 ± 3                        |
| #3                                                    | 15 ± 10                                  | 33 ± 1                     | 52 ± 11                       |
| #4                                                    | NA                                       | NA                         | NA                            |
| #5                                                    | 11                                       | 47                         | 42                            |
| #6                                                    | 24 ± 17                                  | 51 ± 21                    | 25 ± 4                        |
| #7                                                    | 12 ± 2                                   | 54 ± 4                     | 34 ± 6                        |
| #8                                                    | 15 ± 2                                   | 39 ± 2                     | 46 ± 4                        |
| #9                                                    | 34 ± 6                                   | 24 ± 8                     | 42 ± 6                        |
| #10                                                   | 19 ± 5                                   | 42 ± 4                     | 39 ± 7                        |
| #11                                                   | 17 ± 7                                   | 19 ± 20                    | 64 ± 27                       |
| #12                                                   | 24 ± 18                                  | 18 ± 4                     | 58 ± 22                       |
| #13                                                   | 9 ± 1                                    | 38 ± 16                    | 53 ± 17                       |
| #14                                                   | 17 ± 2                                   | 57 ± 3                     | 26 ± 1                        |
| #15                                                   | 30 ± 6                                   | 40 ± 8                     | 30 ± 2                        |
| #16                                                   | 20 ± 3                                   | 20 ± 18                    | 60 ± 20                       |
| #17                                                   | 22 ± 2                                   | 20 ± 5                     | 58 ± 7                        |
| #18                                                   | 14 ± 3                                   | 51 ± 9                     | 35 ± 9                        |
| #19                                                   | 12 ± 3                                   | 63 ± 13                    | 25 ± 10                       |
| #20                                                   | 15 ± 5                                   | 62 ± 6                     | 22 ± 2                        |
| #21                                                   | 18 ± 5                                   | 63 ± 19                    | 19 ± 7                        |
| #22                                                   | 34                                       | 19                         | 47                            |
| #23                                                   | NA                                       | NA                         | NA                            |
| #24                                                   | 34 ± 4                                   | 36 ± 5                     | 30 ± 7                        |
| #25                                                   | NA                                       | NA                         | NA                            |
| #26                                                   | 33 ± 6                                   | 22 ± 4                     | 45 ± 10                       |
| #27                                                   | 13 ± 11                                  | 11 ± 7                     | 76 ± 18                       |
| #28                                                   | 23                                       | 17                         | 60                            |

**Table S3**

Effect of *NUP98-HOXA10hd* on individual HSC clones of CD45<sup>+</sup>EPCR<sup>+</sup>CD48<sup>-</sup>CD150<sup>+</sup> (E-SLAM) phenotype. NA; not available.

| <i>NUP98-HOXA10hd</i> -transduced clones | Total nucleated cells | Fraction transplanted / each mouse (M) | (+) recipients / total # of M transplanted | LD reached (yes/no) | Estimated (min.) HSC expansion → # of HSCs generated <i>in vitro</i> | Range defined by ± 1 S.E. |
|------------------------------------------|-----------------------|----------------------------------------|--------------------------------------------|---------------------|----------------------------------------------------------------------|---------------------------|
| 7                                        | 2500000               | 1/100th/2M -<br>1/1000th/3M            | 2/2 -3/3                                   | no                  | >1098.75                                                             | 522.75 ±<br>2309.25       |
| #2                                       | 1250000               | 1/100th/2M -<br>1/1000th/3M            | 2/2 -3/3                                   | no                  | >1098.875                                                            | 523 ±<br>2308.5           |
| #3                                       | 2500000               | 1/100th/2M -<br>1/1000th/3M            | 2/2 -3/3                                   | no                  | >1098.75                                                             | 523 ±<br>2308.5           |
| #4                                       | 2000000               | 1/100th/2M -<br>1/1000th/3M            | 2/2 -3/3                                   | no                  | >1098.6                                                              | 522.4 ±<br>2310           |
| #5                                       | 1500000               | 1/100th/2M -<br>1/1000th/3M            | 2/2 -3/3                                   | no                  | >1098.9                                                              | 523.05 ±<br>2308.5        |
| #6                                       | 1250000               | 1/100th/2M -<br>1/1000th/3M            | 2/2 -3/3                                   | no                  | >1098.625                                                            | 522.5 ±<br>2310           |
| #7                                       | 1600000               | 1/100th/1M -<br>1/1000th/3M            | 1/1 -3/3                                   | no                  | >1098.72                                                             | 522.72 ±<br>2309.28       |
| #8                                       | 900000                | 1/100th/1M -<br>1/1000th/3M            | 1/1 -3/3                                   | no                  | >1098.72                                                             | 522.72 ±<br>2309.22       |
| #9                                       | 1650000               | 1/100th/1M -<br>1/1000th/3M            | 1/1 -3/3                                   | no                  | >1098.735                                                            | 522.72 ±<br>2309.175      |
| #10                                      | 1400000               | 1/100th/1M -<br>1/1000th/2M            | 1/1 -2/2                                   | no                  | >697.9                                                               | 258.02 ±<br>1887.2        |
| #11                                      | 1900000               | 1/100th/1M -<br>1/1000th/3M            | 1/1 -3/3                                   | no                  | >1098.77                                                             | 522.69 ±<br>2309.26       |
| #12                                      | 700000                | 1/50th/1M -<br>1/500th/2M              | 0/1 - 0/2                                  | no                  | not detected                                                         | NA                        |
| #13                                      | 800000                | 1/50th/1M -<br>1/500th/2M              | 0/1 - 0/2                                  | no                  | not detected                                                         | NA                        |
| #14                                      | 900000                | 1/50th/1M -<br>1/500th/2M              | 1/1 - 2/2                                  | no                  | >348.93                                                              | 128.7 ±<br>943.65         |
| #15                                      | 500000                | 1/100th/1M -<br>1/1000th/2M            | 1/1 - 2/2                                  | no                  | >697.85                                                              | 258.05 ±<br>1887.25       |
| #16                                      | 1500000               | 1/100th/1M -<br>1/1000th/2M            | 1/1 - 2/2                                  | no                  | >697.8                                                               | 258 ±<br>1887.3           |
| #17                                      | 600000                | 1/1000th/2M                            | (2/2)                                      | no                  | >693.12                                                              | 249.9 ±<br>1922.52        |

**Table S4**

Average peripheral blood lineage contribution to donor-derived compartment of representative recipients shown in figure 1C (bottom panel). NA; not available.

| <b>NUP98-<br/>HOXA10hd-<br/>transduced<br/>clones</b> | <b>% myeloid cells <math>\pm</math><br/>SD<br/>(% Ly6G/Mac1)</b> | <b>% B cells <math>\pm</math> SD<br/>(% B220)</b> | <b>% T cells <math>\pm</math> SD<br/>(% CD4/CD8)</b> |
|-------------------------------------------------------|------------------------------------------------------------------|---------------------------------------------------|------------------------------------------------------|
| #1                                                    | 9 $\pm$ 5                                                        | 17 $\pm$ 6                                        | 74 $\pm$ 11                                          |
| #2                                                    | 14 $\pm$ 4                                                       | 19 $\pm$ 4                                        | 67 $\pm$ 6                                           |
| #3                                                    | 19 $\pm$ 11                                                      | 30 $\pm$ 5                                        | 51 $\pm$ 6                                           |
| #4                                                    | 8 $\pm$ 2                                                        | 29 $\pm$ 10                                       | 63 $\pm$ 10                                          |
| #5                                                    | 11 $\pm$ 4                                                       | 8 $\pm$ 5                                         | 81 $\pm$ 9                                           |
| #6                                                    | 7 $\pm$ 3                                                        | 18 $\pm$ 7                                        | 75 $\pm$ 8                                           |
| #7                                                    | 24 $\pm$ 7                                                       | 16 $\pm$ 2                                        | 60 $\pm$ 6                                           |
| #8                                                    | 14 $\pm$ 2                                                       | 17 $\pm$ 4                                        | 69 $\pm$ 5                                           |
| #9                                                    | 25 $\pm$ 2                                                       | 23 $\pm$ 6                                        | 52 $\pm$ 6                                           |
| #10                                                   | 34 $\pm$ 1                                                       | 13 $\pm$ 1                                        | 53 $\pm$ 1                                           |
| #11                                                   | NA                                                               | NA                                                | NA                                                   |
| #12                                                   | NA                                                               | NA                                                | NA                                                   |
| #13                                                   | NA                                                               | NA                                                | NA                                                   |
| #14                                                   | 28 $\pm$ 7                                                       | 33 $\pm$ 12                                       | 39 $\pm$ 6                                           |
| #15                                                   | 17 $\pm$ 3                                                       | 22 $\pm$ 3                                        | 61 $\pm$ 1                                           |
| #16                                                   | 29 $\pm$ 10                                                      | 28 $\pm$ 1                                        | 43 $\pm$ 10                                          |
| #17                                                   | 19 $\pm$ 3                                                       | 23 $\pm$ 5                                        | 58 $\pm$ 3                                           |

**Table S5**

Calculated day 10 HSC frequencies and HSC content estimates of total or various FACS-purified subpopulations of *NUP98-HOXA10hd*-transduced and *in vitro* cultured bm cells (as shown in figure 3C).

| Cell population analyzed                                      | Bulk                                    | CD150 <sup>+</sup> CD48 <sup>-</sup> subset | CD150 <sup>+</sup> CD48 <sup>+</sup> subset | CD150 <sup>-</sup> CD48 <sup>+/-</sup> subset |
|---------------------------------------------------------------|-----------------------------------------|---------------------------------------------|---------------------------------------------|-----------------------------------------------|
| Day 10 total nucleated cells ± SD                             | 2500000 ± 424264.1                      | 240000 ± 40729.3506                         | 360000 ± 61094.02589                        | 1620000 ± 274923.1165                         |
| Day 10 HSC frequency <i>in vitro</i> (range defined by ± SEM) | 1 in 116<br>(+) 1 in 68<br>(-) 1 in 198 | 1 in 30<br>(+) 1 in 16<br>(-) 1 in 57       | 1 in 58<br>(+) 1 in 28<br>(-) 1 in 121      | 1 in 259<br>(+) 1 in 123<br>(-) 1 in 545      |
| Day 10 estimated HSC content                                  | ~21552                                  | ~8000                                       | ~6207                                       | ~6255                                         |
| 10-day HSC expansion <i>in vitro</i>                          | ~2155-fold                              |                                             |                                             |                                               |

**Table S6**

Calculated day 10 HSC frequencies and HSC content estimates of total or various FACS-purified subpopulations of *NUP98-HOXA10hd*-transduced and *in vitro* cultured bm cells (as shown in figure 4B).

| Cell population analyzed                                      | Bulk                                    | lin <sup>-</sup> Sca1 <sup>+</sup> CD43 <sup>+</sup> c-kit <sup>+</sup> Mac1 <sup>(dim)</sup> subset | lin <sup>-</sup> Sca1 <sup>+</sup> CD43 <sup>+</sup> c-kit <sup>+</sup> Mac1 <sup>-</sup> subset | lin <sup>-</sup> Sca1 <sup>+</sup> CD43 <sup>-</sup> c-kit <sup>+</sup> Mac1 <sup>++</sup> subset |
|---------------------------------------------------------------|-----------------------------------------|------------------------------------------------------------------------------------------------------|--------------------------------------------------------------------------------------------------|---------------------------------------------------------------------------------------------------|
| Day 10 total nucleated cells ± SD                             | 3900000 ± 264575.1                      | 128700 ± 8730.9790327                                                                                | 167700 ± 11376.73064                                                                             | 31200 ± 2116.601049                                                                               |
| Day 10 HSC frequency <i>in vitro</i> (range defined by ± SEM) | 1 in 105<br>(+) 1 in 71<br>(-) 1 in 154 | 1 in 4<br>(+) 1 in 3<br>(-) 1 in 5                                                                   | 1 in 83<br>(+) 1 in 58<br>(-) 1 in 119                                                           | 1 in 388<br>(+) 1 in 143<br>(-) 1 in 1051                                                         |
| Day 10 estimated HSC content                                  | ~37143                                  | ~32175                                                                                               | ~2020                                                                                            | ~80                                                                                               |
| 10-day HSC expansion <i>in vitro</i>                          | ~2476-fold                              |                                                                                                      |                                                                                                  |                                                                                                   |

**Table S7**

Design matrix for the two-level factorial experiment. The concentrations for each of the 4 factors were as follows: -1 = low value; 0 = mid value (10-fold lower concentrations than high value); 1 = high value. For IL-3 -1 = 0 ng/ml, 0 = 0.6 ng/ml, 1 = 6 ng/ml; for IL-6 -1 = 0 ng/ml, 0 = 1 ng/ml, 1 = 10 ng/ml, for SF -1 = 0 ng/ml, 0 = 10 ng/ml, 1 = 100 ng/ml; for TPO -1 = 0 ng/ml, 0 = 10 ng/ml, 1 = 100 ng/ml.

|           | <b>IL-3</b> | <b>IL-6</b> | <b>SCF</b> | <b>TPO</b> |
|-----------|-------------|-------------|------------|------------|
| <b>1</b>  | -1          | -1          | -1         | -1         |
| <b>2</b>  | -1          | -1          | 1          | 1          |
| <b>3</b>  | 0           | 0           | 0          | 0          |
| <b>4</b>  | 1           | -1          | -1         | 1          |
| <b>5</b>  | 0           | 0           | 0          | 0          |
| <b>6</b>  | 0           | 0           | 0          | 0          |
| <b>7</b>  | 1           | 1           | -1         | -1         |
| <b>8</b>  | 1           | -1          | 1          | -1         |
| <b>9</b>  | -1          | 1           | -1         | 1          |
| <b>10</b> | 1           | 1           | 1          | 1          |
| <b>11</b> | -1          | 1           | 1          | -1         |
| <b>12</b> | 0           | 0           | 0          | 0          |
| <b>13</b> | -1          | -1          | 1          | -1         |
| <b>14</b> | 1           | -1          | 1          | 1          |
| <b>15</b> | -1          | -1          | -1         | 1          |
| <b>16</b> | 1           | 1           | 1          | -1         |
| <b>17</b> | -1          | 1           | -1         | -1         |
| <b>18</b> | -1          | 1           | 1          | 1          |
| <b>19</b> | 1           | -1          | -1         | -1         |
| <b>20</b> | 1           | 1           | -1         | 1          |

Figure S1

A

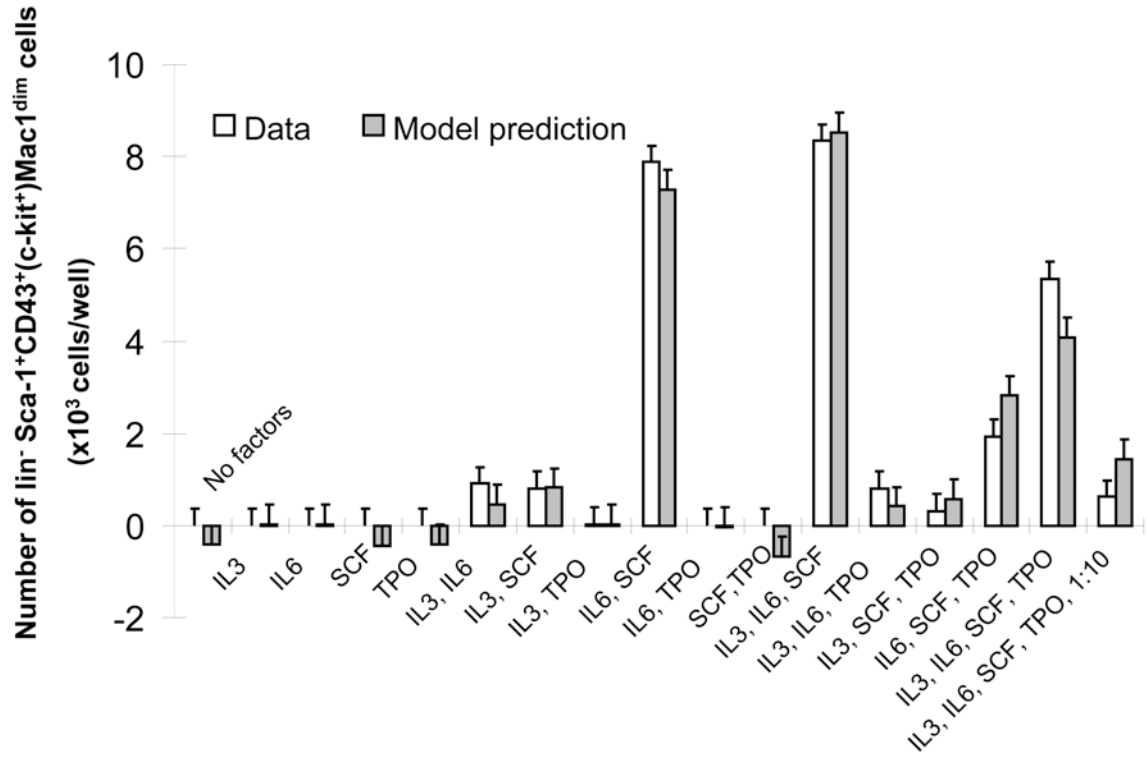

**B**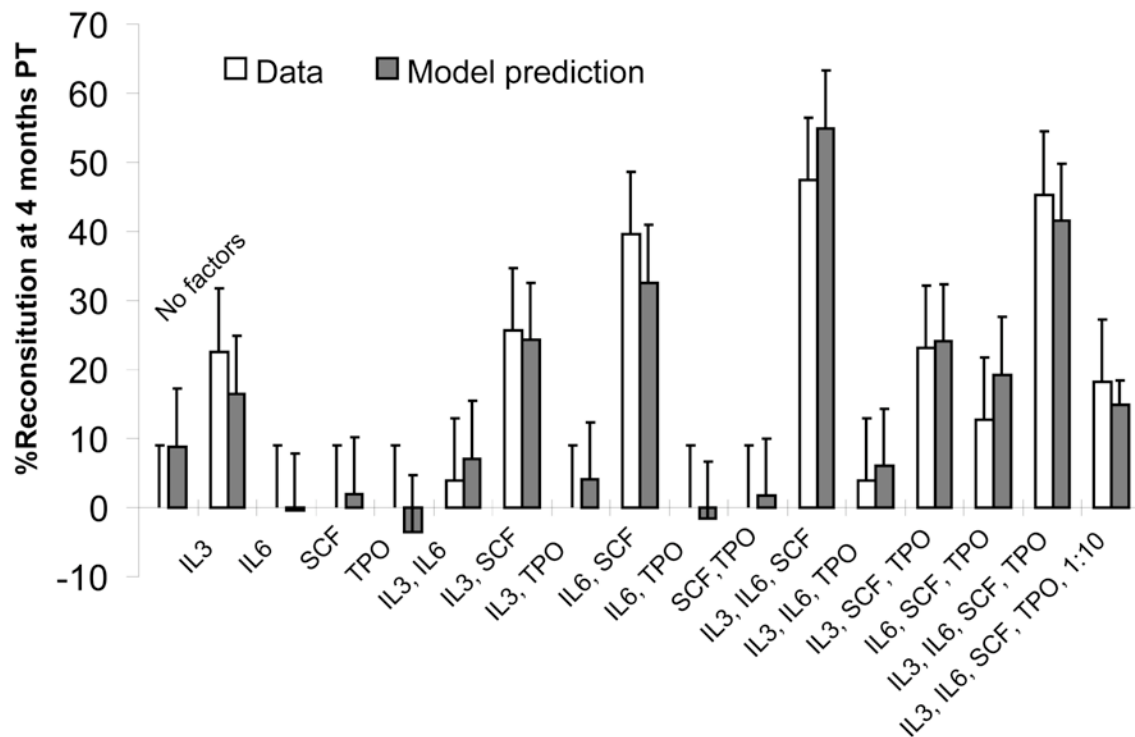

**Figure S1. Number of  $\text{lin}^- \text{Sca1}^+ \text{CD43}^+ (\text{c-kit}^+) \text{Mac1}^+$  cells obtained after 7 days of expansion in various growth factor combinations (A) and the level of reconstitution detected 4 months post transplantation (PT) (B).**

The raw data from cell counts (A) and % reconstitution (B) are shown next to the model prediction. For the raw data, error bars represent the standard deviation measured at the centre point (1:10) condition; for the model prediction, error bars represent the mean square of pure error. Growth factor abbreviations represent the addition of the high level of the given factor (e.g. 6 ng/mL for IL-3). The “IL3, IL6, SF, TPO, 1:10” data point represents the centre point of the factorial design where all growth factors were added together at 1:10 dilution of the high factor level (e.g. 0.6 ng/mL for IL3).
